# Supplementary material for: Particle-phase processing of α-pinene NO 3 secondary organic aerosol in the dark
Source: Copernicus journal article supplement (doi:10.5194/acp-2021-379), 2021-05-11
Supplement: Supplementary file 1 [file acp-2021-379-supplement.pdf]

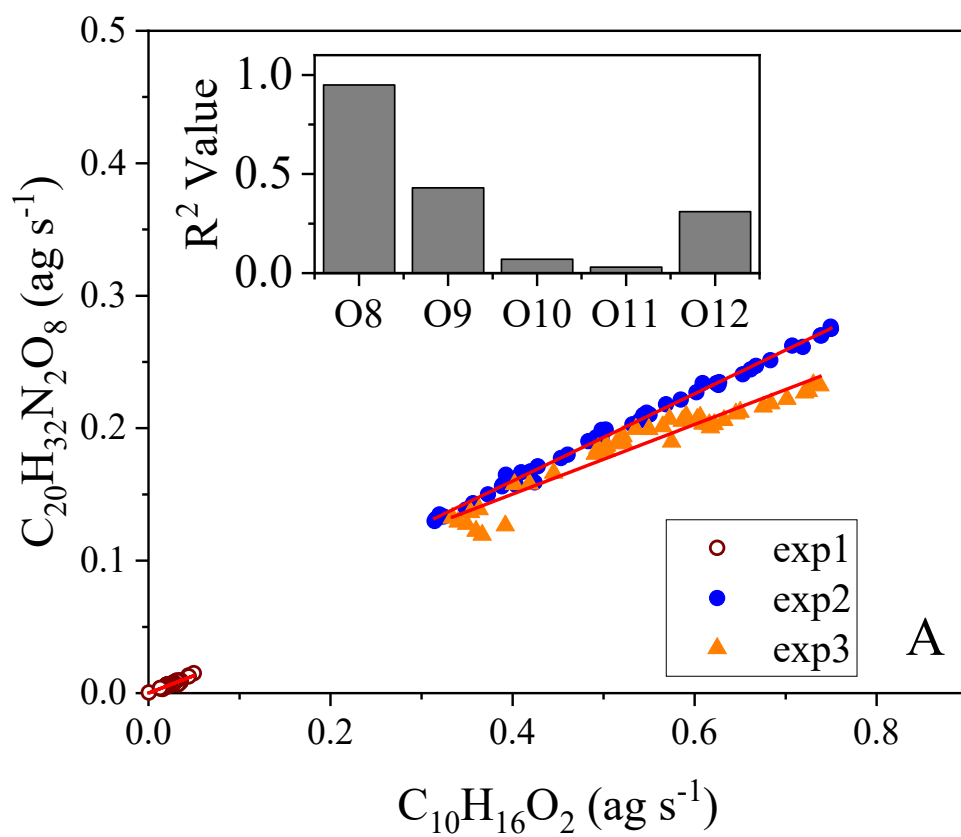

**Figure S1:** Correlation plot of  $C_{10}H_{16}O_2$  and  $C_{20}H_{32}N_2O_8$ . (inset)  $R^2$  values for the comparison between  $C_{10}H_{16}O_2$  and the series of  $C_{20}H_{32}N_2O_x$  ( $x = 8 - 12$ ).

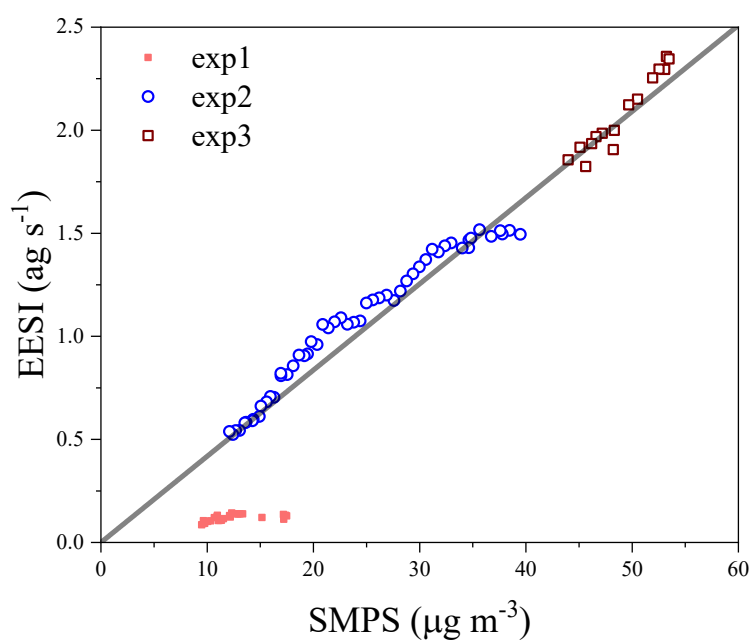

**Figure S2:** EESI mass flux compared to the measured SMPS mass for experiments 1 – 3, when the EESI was present. The total mass flux measured by the EESI is the ion signal ( $\text{s}^{-1}$ ) converted to measured mass per second by scaling each molecular formula according to its mass.

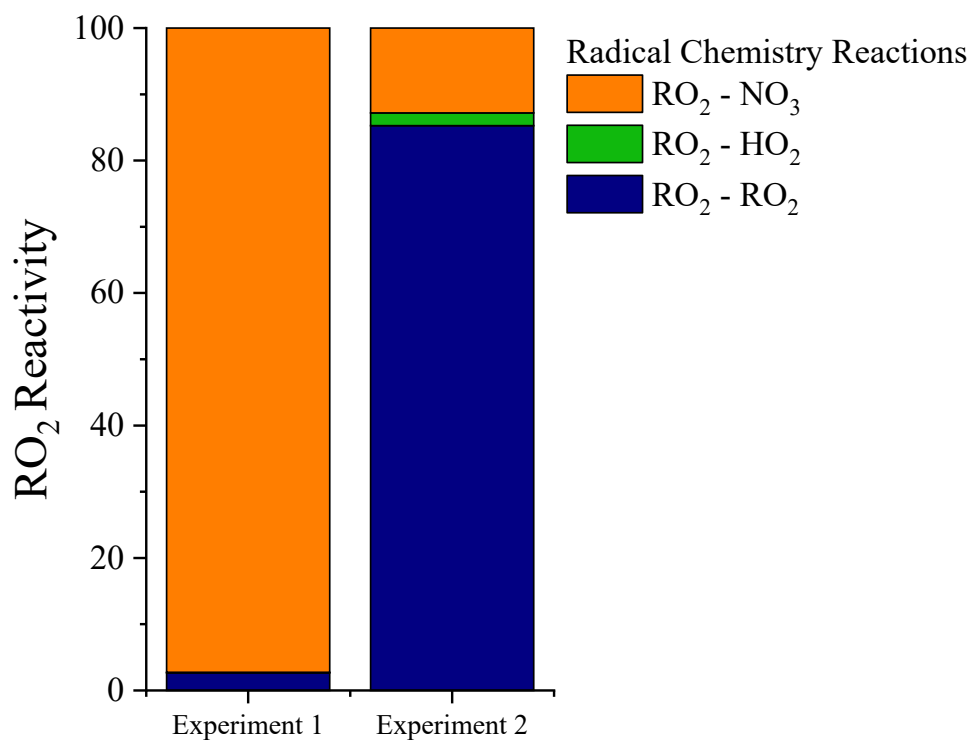

**Figure S3:** Integrated radical reactivity of RO<sub>2</sub> radicals in experiment 1 and experiment 2 modeled with the Master Chemical Mechanism (MCM) (Jenkin et al., 2003; Saunders et al., 2003). The absolute values will differ depending on the reaction rates of RO<sub>2</sub> – RO<sub>2</sub>, but this provides insight into the reactions controlling the initial composition of the particle phase.

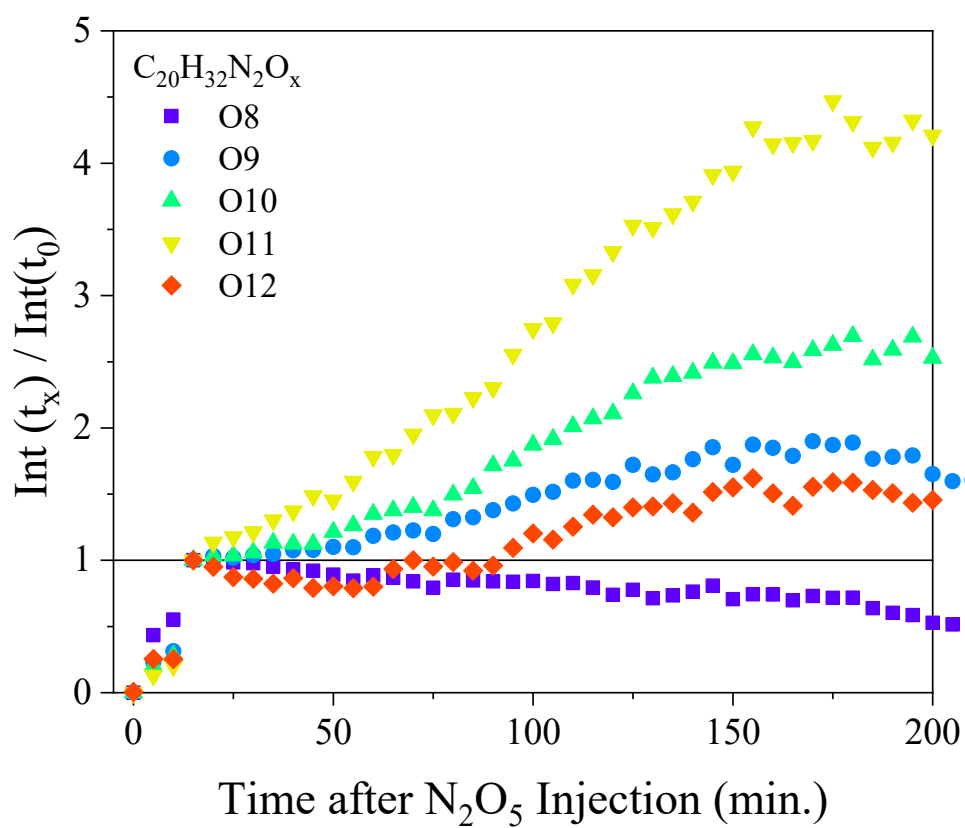

**Figure S4:** Normalized  $C_{20}H_{32}N_2O_x$  dinitrate signals relative to  $t = 15$  min mass from experiment 3.  $t = 15$  min represents the maximum in particle mass, which is why this time was chosen.

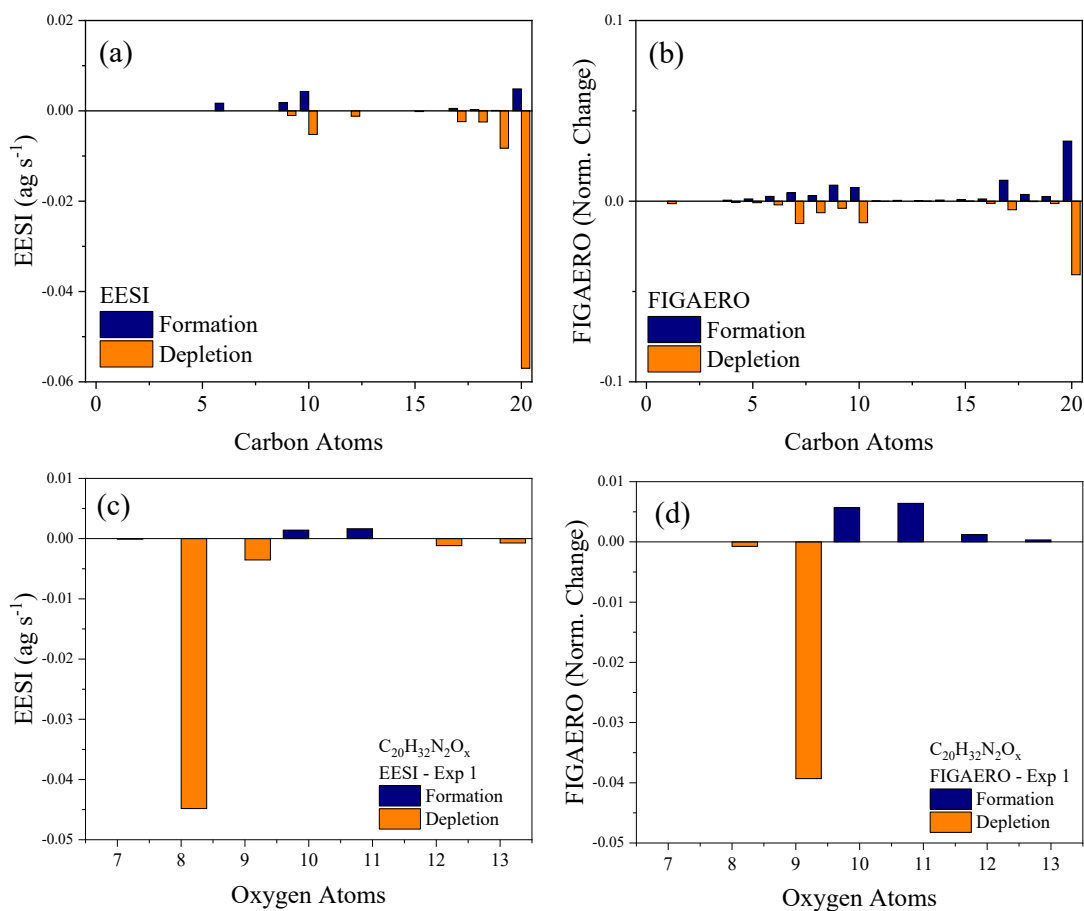

**Figure S5:** (a) and (b) Carbon distribution of the molecules formed (blue) and depleted (orange) in the particle phase during aging for both the EESI (a) and FIGAERO-CIMS (b), respectively for exp 1. (c & d) The change in the oxygen distribution for the  $C_{20}H_{32}N_2O_{8-13}$  molecules during dark aging for the EESI-ToF (c) and FIGAERO-CIMS (d), respectively.

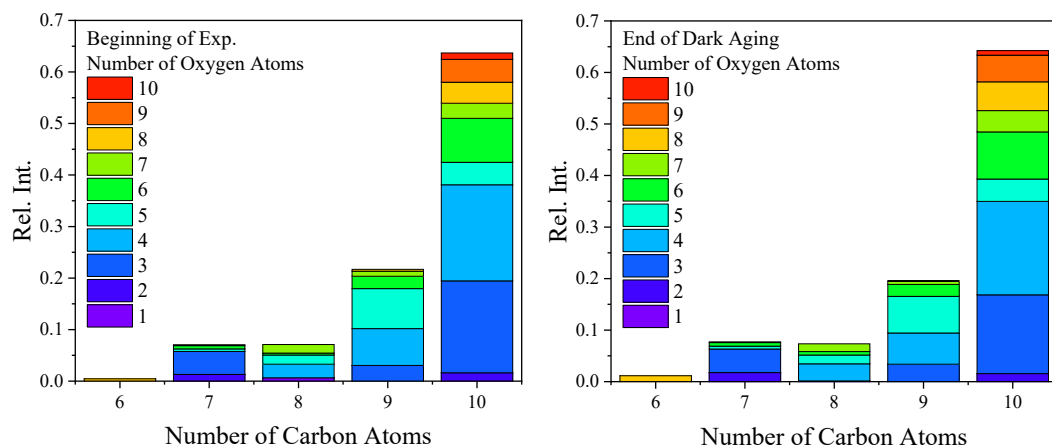

**Figure S6:** Monomer carbon and oxygen atom distribution for the beginning of the experiment  $t_{early} = 10$  min and end of dark aging  $t = 240$  min for exp 2.

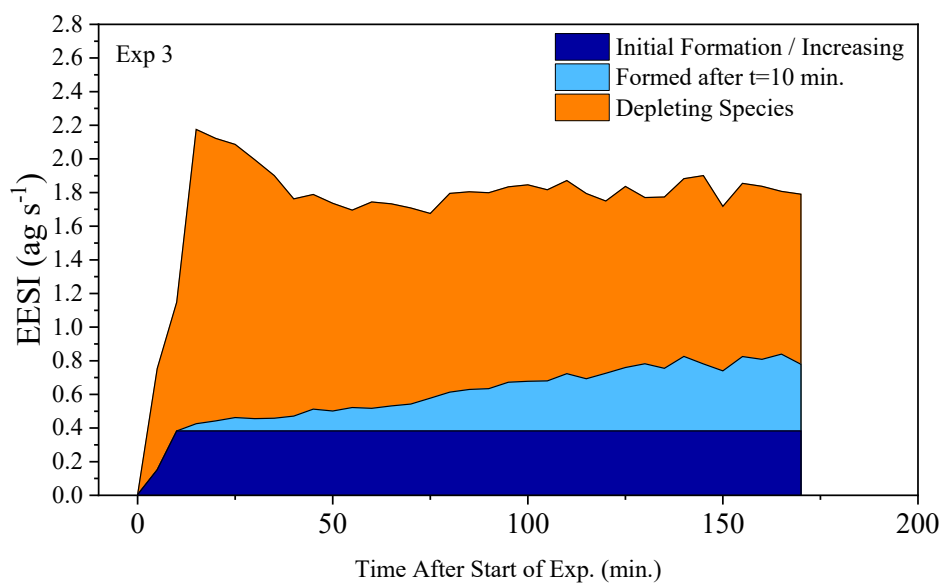

**Figure S7:** Total EESI-ToF intensity plotted as a function of the contribution from different sources, particle phase formation products determined from those molecular formula that increase during dark aging after  $t = 10$  min, while those decreasing are shown in orange. The data is shown for experiment 3. The species forming in the dark are split into the dark blue (intensity at  $t = 15$  min) and the fraction increasing after that time in light blue.

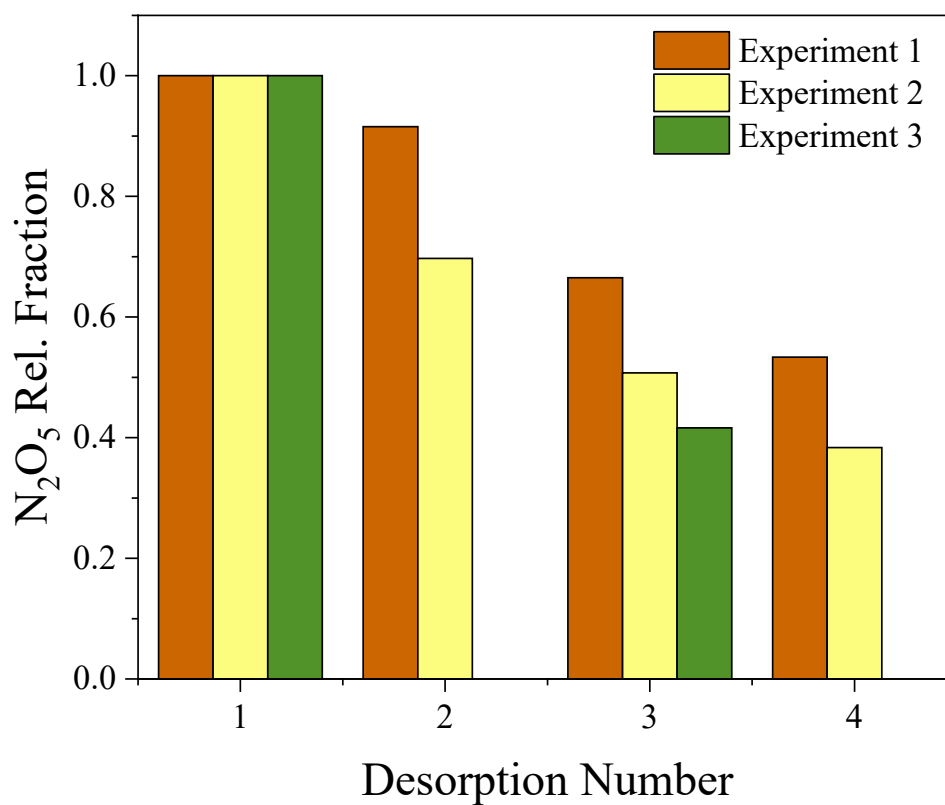

**Figure S8:** N<sub>2</sub>O<sub>5</sub> particle phase relative fraction normalized to the initial desorption measured by the FIGAERO-CIMS. Estimated mass concentrations in the particle phase are 0.03 – 0.06  $\mu\text{g m}^{-3}$ . The time between each desorption was about 1-1.5h.



## References:

Jenkin, M. E., Saunders, S. M., Wagner, V., and Pilling, M. J.: Protocol for the development of the Master Chemical Mechanism, MCM v3 (Part B): tropospheric degradation of aromatic volatile organic compounds, *Atmos. Chem. Phys.*, 3, 181-193, 2003, 10.5194/acp-3-181-2003.

Saunders, S. M., Jenkin, M. E., Derwent, R. G., and Pilling, M. J.: Protocol for the development of the Master Chemical Mechanism, MCM v3 (Part A): tropospheric degradation of non-aromatic volatile organic compounds, *Atmos. Chem. Phys.*, 3, 161-180, 2003, 10.5194/acp-3-161-2003.
